# Supplementary material for: Leukocyte Tyrosine Kinase (Ltk) Is the Mendelian Determinant of the Axolotl Melanoid Color Variant
Source: MDPI journal article supplement (doi:10.3390/genes14040904), 2023-04-13
Supplement: s1 [file s1]

**Supplemental File S1. PCR primers that were used in the study to amplify *Gphn* and *Ltk* sequences for genetic linkage analysis, to amplify *Gphn* and *Ltk* sequences surrounding gRNA target sites, and to perform QPCR.**

| ID              | Forward Primer              | Reverse Primer              |
|-----------------|-----------------------------|-----------------------------|
| GPHN.1          | AGTAGCTTTTAGTAGACCGCAGTAGG  | CTGTTCAAATAAAAAGGTATCCAGTCA |
| GPHN.2          | AAGACTGAGCAGTATGTGGAGCTT    | CGTATTTCAAAGATGAGAAAACACAA  |
| GPHN.3          | CAGCATTTCATGTGGAAATTATTAAAG | ACTAAATCACCTCCTCTGACTGACAT  |
| GPHN.4          | TTCAGTTTATACTGCCAGCCCTAC    | CTGTCCTTTTTTCTCTTCTTCCTCTT  |
| GPHN.5          | CATTACAGTTAATGCATGCCTCTT    | AACTCTCATCAGTCTGGTTTCTGAC   |
| GPHN.6          | TAGGCTGGCTGCCCCAAAG         | ATTCAGAAGTCATCCTGACAGCTC    |
| GPHN.7          | CTGCTGTGTGCGTGCATT          | TAACACGTTTCTTTGTCTTATTACGG  |
| GPHN<br>gRNA 1  | CTGCCAGGTAGTAAGTTGAATGTG    | CGTACCATATTTTACACCCTGTC     |
| GPHN<br>gRNA 2  | CTCCCAACTAACCAGAGACTAACC    | AACGAATAGAGACCAAAAATGCTT    |
| LTK<br>gRNA 1   | TGAGCTTGTCTTGTACATCTTTCC    | CATCAAAAGCAACAGATTCCATTA    |
| LTK<br>gRNA 2   | ACAAAGACTGACCAACAAAAACAA    | CTTAAGTCTTCAGAAAGGGACAGG    |
| LTK<br>Exon 1   | TGTGCTAATGGACGTATGCTTTAT    | TTGTGTCCTGTCTTTCTACGCTAC    |
| LTK<br>Exon 2   | GAGAGAGAAGGAGCTATGAGCTGT    | AATCGAAATGGGAGCTATTAACAC    |
| LTK<br>Exon 3   | AGTCCATTTTGCTTTTAACCAGAG    | ACTTCATGCGAGAAAATAGAAAGG    |
| LTK<br>Exon 4   | AATCCCAATGAAGGCACGTAAC      | ACTGGCAAACAAATACTGAGCTTT    |
| LTK<br>Exon 5   | TGTAAATAGAACAGTCTGCCCTCA    | CGAAGCTTTGTGCGATTCTAATATG   |
| LTK<br>Exon 6   | GCACACCTGTAGCCTAAAGAGTAA    | GCAGTTGAGCAGTGTTATTCCTA     |
| LTK<br>Exon 7   | AGATATTTGGTCACATGGTTTCC     | GAGGCATCGGGTTATTAAGAAAT     |
| LTK<br>Exon 7-8 | GCAGATGGTACTGCAAGAGCTTA     | CTGCAGATTTACTGGAAACCAAC     |
| LTK<br>Exon 8.1 | CTTTCCTACAGAACAGACCATTTAAG  | ATTCAGCAAGGGAGAAGTGGTC      |
| LTK<br>Exon 8.2 | TCAAGTTTTTCAGTTCACATTTTCG   | CTGCAGATTTACTGGAAACCAAC     |
| LTK<br>Exon 8.3 | GCATTTCTTAATAACCCGATGC      | AACGTCAGAGGAGCACTGTGTA      |
| LTK<br>Exon 9   | ACTATCACCTCCCACTTCTGTAGC    | CGGCTGAAAATTGAGACTTTTATT    |
| LTK<br>Exon 10  | CTGCTTGATGGTTCTCTAGCC       | TATTCGCCATACACCCCTTATATT    |
| LTK<br>Exon 11  | TATAGGAATCAATTGCGCCTTG      | TTCACAAGGTTAGAGGACAGACG     |

|                     |                            |                          |
|---------------------|----------------------------|--------------------------|
| LTK<br>Exon 12      | TACAGAGTGAGAGAGGAGGTGATG   | TTTACCCCCAAATAATACGACTGT |
| LTK<br>Exon 13      | TTGTGATTCACCCCTTTTATTTCT   | CAAGAGAGCAGATGCAATGAGTAT |
| LTK<br>Exon 14      | GATTTGTTTTAGGACTTCCCCTTT   | CTCTTAAGGCTAGCAAACAGTCGT |
| LTK<br>Exon 15      | GATCGCTTGGCTAACAAATATAAGG  | CGGTATCTGATCAAATTCAAAGAA |
| LTK<br>Exon<br>16.1 | CATTATCACCCACTCACACTCTGT   | CTTTTAGAAGGTTGGGTCTTGGAG |
| LTK<br>Exon<br>16.2 | CAAGACCTAATGACTGTGTTTTGC   | GGAAATGAACGAAGAAAGGTCTTA |
| LTK<br>Exon<br>17.1 | TGTTCATGTTCCCTAAGCATTAAA   | TTTTCTTCCAAACAATACCAATGA |
| LTK<br>Exon<br>17.2 | GGGAAGGAGAGGAGACCCTTAC     | CTGTACCTGTGCAGTTGATGTTGT |
| LTK<br>Exon 18      | GTAAGCGGTCGGAGTCTCTCTC     | TATCCAGATTGCAGTGATAAAGGA |
| LTK<br>Exon 19      | CGAATTTGATATGTCAGTCTTTGC   | CCTTAAGGGAAAAGTGAGATGTTT |
| LTK<br>Exon 20      | TTCCAAAAAGGTACTGCTAATTCC   | ACCAAGTGAGTTGACAGCACTAAA |
| LTK<br>Exon 21      | GCGATATTATAATGGATGGGTCTT   | GGGTTGATGGGAGATAGAGTAGAA |
| LTK<br>Exon 22      | TTCTCAGCAGTTCAGAATTGAATC   | AGTTGGGGTTCTAAGATAGACACG |
| LTK<br>Exon 23      | GCTCTGCCATAGATGTAAAGAGGT   | TGGGAGAACACAGAACTTTAATCA |
| LTK<br>Exon 24      | CAGTATTTTTAGAATGGGGCCTAA   | AAACCCACAGTCTTACCTTTCTGA |
| LTK<br>Exon 25      | AAATATCTTGAGGGTGACAAGCTG   | GGTGAGATCACTTTACGCATGTTA |
| LTK<br>Exon 26      | ATGCACGTGTTTCTTTTGTACATT   | GCCAGTACCTTTGATTTACGAGTT |
| LTK<br>Exon 27      | TCTTGATCGTTCTTTGATGTATAAGG | GTGACTATTGATTGGCACATGAAG |
| LTK<br>Exon<br>28.1 | AAAGAATAGTGAGATTTCCGATGG   | CGTCGGTTTAGGGTTAGTATTTTG |
| LTK<br>Exon<br>28.2 | CAAAGACTGACCAACAAAAACAAG   | GGGATTACATTATCGACTCAATCC |
| LTK<br>Exon<br>28.3 | TACTTCACTAATTCCCAACGTAGC   | CAATGTTGGATCTAAGAACCTTGA |

---

|             |                          |                          |
|-------------|--------------------------|--------------------------|
| LTK<br>qPCR | GTATCGAATCATGACACAGTGTTG | ACAGGAAGCTCAGTATTGACGAC  |
| ATP5PB      | CTCAAGAGGTGAAAGATACTGCAA | CCAGTAGCATGACAACATTACTCC |

Supplemental File S2. Representative control and *Ltk* gRNA injected embryos at developmental stage 42.

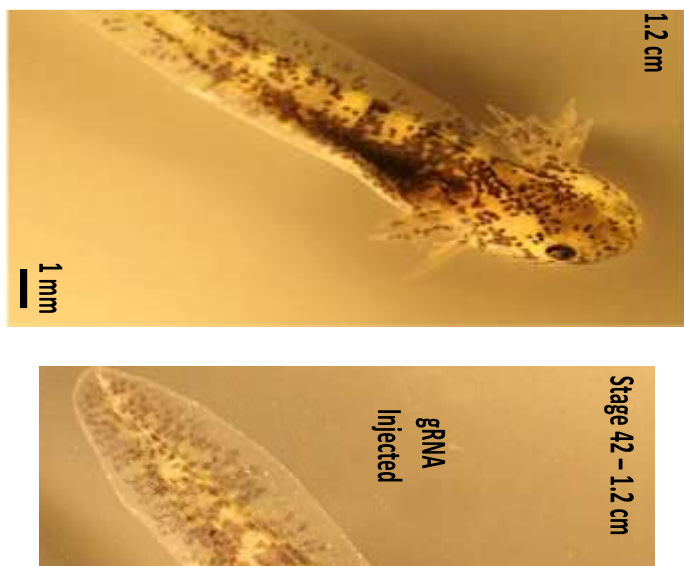

Supplemental File S3. Electropherograms showing *Ltk* gRNA1 editing. The sequences were generated using the *Ltk* gRNA1 reverse PCR primer.

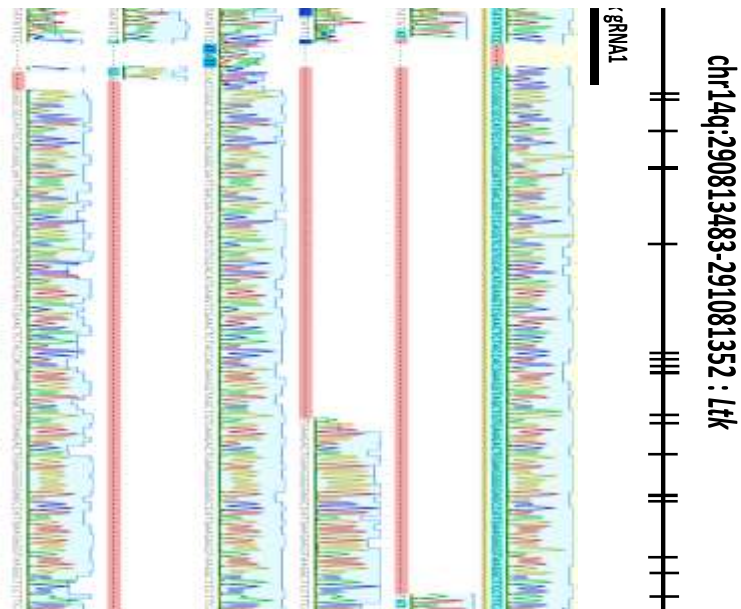

**Supplemental File S4. Electropherograms showing *Ltk1* gRNA2 editing. The sequences were generated using the *Ltk* gRNA2 forward PCR primer.**

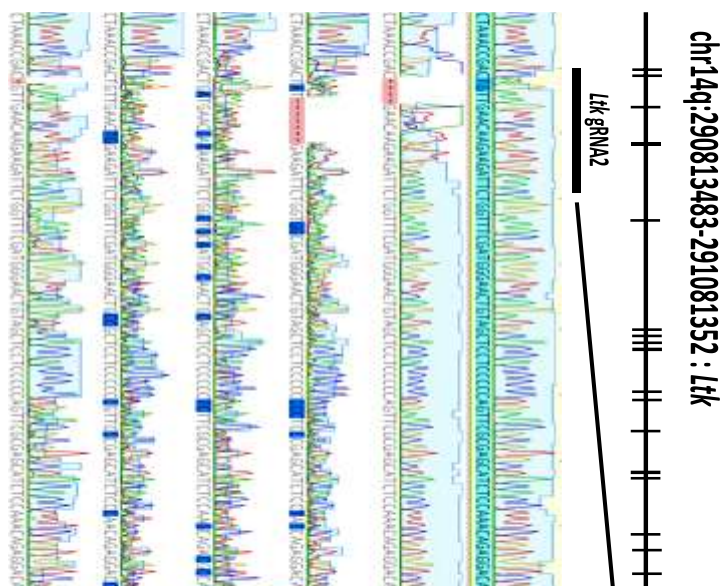

Supplemental File S5. Electropherograms showing *Gphn* gRNA1 editing for 5 of 9 Crispants that were assessed for genome editing. The sequences were generated using the *Gphn* gRNA1 forward PCR primer.

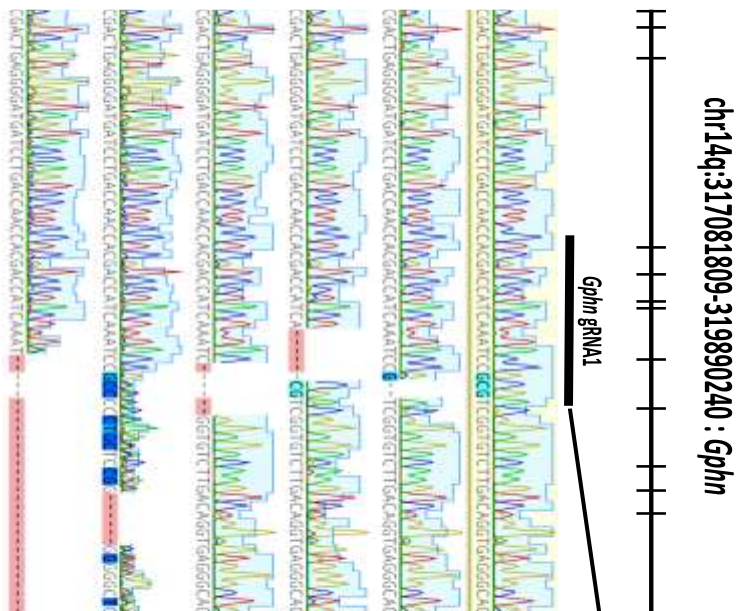

**Supplemental File S6. Electropherograms showing *Gphn* gRNA2 editing for 5 of 9 Crispants that were assessed for genome editing. The sequences were generated using the *Gphn* gRNA2 forward PCR primer.**

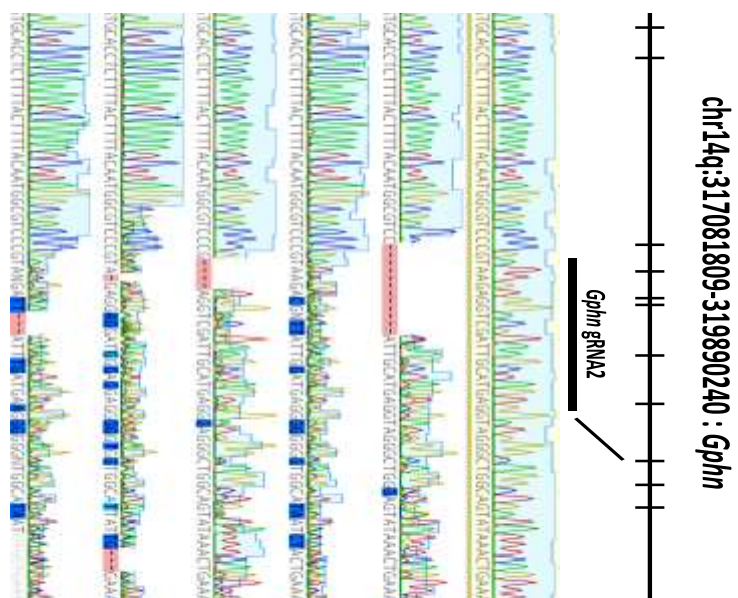



**Supplemental File S7.** *Ltk* nucleotide sequences generated for *A. mexicanum* wild type and melanoid alleles. Dots show conserved nucleotides.

|                     |                                                                                                                                 |      |
|---------------------|---------------------------------------------------------------------------------------------------------------------------------|------|
| Consensus           | ATGTGCTTAGTTGCAGTTTCTGGCTTTGGATCCAAACGCCATAGAAGACATCACATCGCCGAGGCCACCGTCGCCAGGCGCATCACAGCAGGCTGATGTAACACTAGAGGACCACCTGTCCAGTGC  | 125  |
| Ltk_melanoid allele | .....                                                                                                                           | 125  |
| Ltk_wildtype allele | .....                                                                                                                           | 125  |
| Consensus           | TGAGTACTCGTGCAACTTGGAGTCTGACTGCCCATGGACTTCTTCCAGGACGGATAACGCCGAGCCCACTGGGAGCGGATACCACCGGGTGCCTGACAGGACAGCATGAAGACCTCCTTCTGG     | 250  |
| Ltk_melanoid allele | .....                                                                                                                           | 250  |
| Ltk_wildtype allele | .....                                                                                                                           | 250  |
| Consensus           | GGGACAGCGCATCACCTGGCGATATGAAAGGTGGACTCCTTCTCTAAACACTAGTCTACACGCAGGSCAATGTGAGTTCGGCTGAGCAGCCCGCTCCTGCCCTGGAGCTCGGCTCAATGCCTG     | 375  |
| Ltk_melanoid allele | .....C.....                                                                                                                     | 375  |
| Ltk_wildtype allele | .....G.....                                                                                                                     | 375  |
| Consensus           | CTGGAAATGGATGTATATTTCCACCGGGCGCCATGCCAGGGCGATTGACGGTCCAGGTCGTGCACATGAAGTCGAAGTCTACCCAGAAAGGTAGCTGTGAAGACTGGAGGGGGACCATGAAGAG    | 500  |
| Ltk_melanoid allele | .....                                                                                                                           | 500  |
| Ltk_wildtype allele | .....                                                                                                                           | 500  |
| Consensus           | GGAGACCAGGAAGCTGTTGACGGCGGACATTGGCCAGGTGGACGCGCGTTCCAGATCTCCGTGGCGTATTTCATCGTGGCGGTGGAAAAAGAGGAAGGCTGCTGGCGTTCAACTCCCTGCGAC     | 625  |
| Ltk_melanoid allele | .....                                                                                                                           | 625  |
| Ltk_wildtype allele | .....                                                                                                                           | 625  |
| Consensus           | TCAGCAGCTGCTCCGGGATGAAGAGGCTCCTGACCTGTCCAGGTGCACCCAGGACTCCTCGTTCTATTGCACATCAGGGGCTGCATCAGTCGCCTGCAGGTGTGCGACTTTCATCTGGACTGT     | 750  |
| Ltk_melanoid allele | .....                                                                                                                           | 750  |
| Ltk_wildtype allele | .....                                                                                                                           | 750  |
| Consensus           | CCCGGGGAGAGGATGAGGGCGATATTTTGTCATCCCTCCTCCAGAGGGAGCATTTTGTTCCTYCAGTGGGAGCCTGCGACTGGGCTATGGACGATGCCGCSGCAACCGCGAGTTGGTCCAT       | 875  |
| Ltk_melanoid allele | .....C.....                                                                                                                     | 875  |
| Ltk_wildtype allele | .....T.....G.....                                                                                                               | 875  |
| Consensus           | CGTGGACTCGAAGCAGACGGATCCCGAAGCACCGGTTCTCGGCTCTGCTTTAAAGCTACTGCTGGGCACCTTCCTTTACCTGCGGGTACAGGATCAGTGGGCAGATGGTACTGCAAGAGCTTACA   | 1000 |
| Ltk_melanoid allele | .....                                                                                                                           | 1000 |
| Ltk_wildtype allele | .....                                                                                                                           | 1000 |
| Consensus           | GCGCCAACTGCCAGGCGTGTTCCTCAGCAAGATTGTCAGGTCAAGTTTTCAGTTCACATTTTCGGGGCTTACAATGGAACAGTCTCCCTCGCTGTCTTGAGAAGGTGGCGGGCCCTACAGGC      | 1125 |
| Ltk_melanoid allele | .....                                                                                                                           | 1125 |
| Ltk_wildtype allele | .....                                                                                                                           | 1125 |
| Consensus           | AGTGCCAGCTGGTTTGGGAAGAACGCCAGCTGGGGCGACCGTTGGTTTCCAGTAAATCTGCAGCTGCCAGAGCTCCGGGACGGGTTCAGCTGGTGCTCCAGGCTTCCTGGGGTTGGGGCTC       | 1250 |
| Ltk_melanoid allele | .....                                                                                                                           | 1250 |
| Ltk_wildtype allele | .....                                                                                                                           | 1250 |
| Consensus           | GCTGGCGGACATCGCTGTGATAACATCACCGTCACAGCAGATTGCTTCCAGGAAGGAAGAAGACATGGTCAAGCTGGCAAAACACAGTTTGCTCGGGAGGTAAACCGAAGGGAAGAGCCAGC      | 1375 |
| Ltk_melanoid allele | .....                                                                                                                           | 1375 |
| Ltk_wildtype allele | .....                                                                                                                           | 1375 |
| Consensus           | TGACCCCTTTCGGGATCCCTCCGCTTCAGGGCGACSTCAGACGTGGAGTGGTGGTTTACAGCGTGTGGCGCAGTGGCCCCCGGGGGCCAACGCAAGCTCAGTGTGACAATGCTTATCGGAAC      | 1500 |
| Ltk_melanoid allele | .....C.....                                                                                                                     | 1500 |
| Ltk_wildtype allele | .....G.....                                                                                                                     | 1500 |
| Consensus           | ACCAACGCTCTGGTCACCATGGAACGGACGGCGCACTCCAGGGGGTGCAAAATATGGAGAGTGCCCGCAACTAACATCTACAGAATTTCTGCCTATGGCGCAGCTGGCGGAAAAGGACTGAAGAA   | 1625 |
| Ltk_melanoid allele | .....                                                                                                                           | 1625 |
| Ltk_wildtype allele | .....                                                                                                                           | 1625 |
| Consensus           | CCACAACAAGCGATCCCACGGTGTCTTCATATCCGCCACTTCCGACTCCAGAAAGACGAATCCTCTACATCTTGGTGGGACAGCAGGGGAAGATGCTTGCCACGGGGAAATGTGCTGACTA       | 1750 |
| Ltk_melanoid allele | .....                                                                                                                           | 1750 |
| Ltk_wildtype allele | .....                                                                                                                           | 1750 |
| Consensus           | GGGAGCTCGCTCGGAGAGTCATCCATCACTGAATTGGAGTACTATGAKAATAAAACCTTCTGCAGTGGGCTGAGGAGGAGGTGGYGGTGGGGGAGCCTCCTACATATTTAAGCTCGACAAC       | 1875 |
| Ltk_melanoid allele | .....T.....C.....                                                                                                               | 1875 |
| Ltk_wildtype allele | .....G.....T.....                                                                                                               | 1875 |
| Consensus           | GGGGTCTTCAGGCCCTACTCATCGCAGCTGGAGGAGCGGGAAGGSCCTACTTGAAGACCAAGGGTTCTCGGAACAAGRCACCTGGAGGAGTYTTGAGAAGACATTGCAGYCCCGGGTGT         | 2000 |
| Ltk_melanoid allele | .....G.....C.....                                                                                                               | 2000 |
| Ltk_wildtype allele | .....A.....C.....T.....                                                                                                         | 2000 |
| Consensus           | CAATGGAAGAGCTGGGGCAGCAGGTGGYGGCGGTGGATGGAATGACAGCACCTCTACCCCGGTCTGGGAAGTCGCTCATGGAAGGGGCAGAGGGYGGTAAGGTTTGCCCCCAAGCATCAGTA      | 2125 |
| Ltk_melanoid allele | .....T.....C.....                                                                                                               | 2125 |
| Ltk_wildtype allele | .....C.....                                                                                                                     | 2125 |
| Consensus           | ATCTGCATTGGACCACGTCGGGGGATTTTGGAGGCGGAGGGGCGCCTGTACCTCTGGAGGTGGAGGTGGAGGGTATAAAGGTGGAMATGCATCAGAATTTGATGACCTCACAACCGATGGAGAA    | 2250 |
| Ltk_melanoid allele | .....A.....                                                                                                                     | 2250 |
| Ltk_wildtype allele | .....C.....                                                                                                                     | 2250 |
| Consensus           | GATGGCATCTCCTTCATGAGCCAGCCGGGAGATTTTCTCAGCCTCTGGCAGCCATGGAGGCCATGGGGAGGTGCAGATCGAAGTGTTCTTGAAGTGAACCAACTGCTGTGTCTGGAACTG        | 2375 |
| Ltk_melanoid allele | .....                                                                                                                           | 2375 |
| Ltk_wildtype allele | .....                                                                                                                           | 2375 |
| Consensus           | CAAGCGGGACCCCCGAACCAAGCTCGTCACCTGCATCTGCAAAAGTGGAGAGCTGCTGGCCAGTGACAACATCAACTGCACAGAGCCAGACTTGGAGGAGCACTTCCCCATCCCCCTTATCCTGT   | 2500 |
| Ltk_melanoid allele | .....                                                                                                                           | 2500 |
| Ltk_wildtype allele | .....                                                                                                                           | 2500 |
| Consensus           | CAGTGGTCACTGCGACGGTAATACTTGGTGTGATCTTCACTTGTGGCGGCCTGTCACTTGTATTATCACCGCAAGAAGCAGCAGCTTGAGGGAGCACTATTTCGACTGCAAAAGCTCAGAGTACAAA | 2625 |
| Ltk_melanoid allele | .....                                                                                                                           | 2625 |
| Ltk_wildtype allele | .....                                                                                                                           | 2625 |
| Consensus           | CTGAGTAAATCCGAACGTCCACTATCATGACAGACTACAACCTTAACCTACTGCTTTCGGGAAAGGCAGCTACATTAAGTGAGCTAAAGGAGATACCTCGCAAGAATCATCTCCCTTCTGCGGGC   | 2750 |
| Ltk_melanoid allele | .....                                                                                                                           | 2750 |
| Ltk_wildtype allele | .....                                                                                                                           | 2750 |
| Consensus           | CCTGGGCGATGGTGTCTTTGGAGAGGTTTATGAGGGGACAGTGGTAGGGATGGCAGGTGACCCCAACCTCTCCAGGTGGAATCAAGACGCTGCCTGAAATCAGCTCAGAACAGGACGAGATGG     | 2875 |
| Ltk_melanoid allele | .....                                                                                                                           | 2875 |
| Ltk_wildtype allele | .....                                                                                                                           | 2875 |
| Consensus           | ACTTCTCATGGAGGCCTTGATTATCAGTAAGTTCAGTACCAGAACATTGTCGCTCGCTCGGAGTGAGCCTGCAGACGCTGCCGCGCTTCATTCTGCTGGAGCTCATGGCTGGTGGAGACATG      | 3000 |
| Ltk_melanoid allele | .....                                                                                                                           | 3000 |
| Ltk_wildtype allele | .....                                                                                                                           | 3000 |
| Consensus           | AAGAGCTTCCTCCGACAGAATCGGCCTCGCGTCTCAAGCCATCCAGCCTGACGATGCTGACCTGCTAAACATGGCGCGAGATATTGCCGTGGCAGTAAATACCTCGAGGAYAACTCACTTCAT     | 3125 |
| Ltk_melanoid allele | .....C.....                                                                                                                     | 3125 |
| Ltk_wildtype allele | .....T.....                                                                                                                     | 3125 |
| Consensus           | CCACAGGGATATAGCAGCCAGAACTGCCTTCTTACCTGCGGGCGCCAGGGTCTGTGGCCAAAATAGGAGACTTTGGAATGGCTCGGGACATTACAGGSCCAGCTACTACCGGAAAGGGGGCA      | 3250 |
| Ltk_melanoid allele | .....                                                                                                                           | 3250 |
| Ltk_wildtype allele | .....                                                                                                                           | 3250 |
| Consensus           | GGGCCATGCTTCCTGTCAAGTGGATGCCACCGGAAGCCTTCTGGAAGGAATATTCACTTCAAAAAACAGACATGGTCCCTTGGCGTACTGCTTTGGGAGATCTTCTCCTTGGGTTATATGCCT     | 3375 |
| Ltk_melanoid allele | .....                                                                                                                           | 3375 |
| Ltk_wildtype allele | .....                                                                                                                           | 3375 |

---

|                     |                                                                                                                                 |      |
|---------------------|---------------------------------------------------------------------------------------------------------------------------------|------|
| Consensus           | TATCCATGTAAACCAACCAGGAAGTGTGGAGTTTGTACCACTGGAGGGCGCATGGATCCCCAAAGAATTGTCCCGGGCCTGTGTATCGAATCATGACACAGTGTGGCAACACAGTCCGGA        | 3500 |
| Ltk_melanoid allele | .....                                                                                                                           | 3500 |
| Ltk_wildtype allele | .....                                                                                                                           | 3500 |
| Consensus           | ATATCGACCGGATTTCACCACCATCTTGAAAAGGATCAAGTATTGCACCCAGGATCCTGACGTCGTCAATACTGAGCTTCCTGTGGAATGCAGCCAGCACCGGAAGAAGAGGGGAGTGC CGRA    | 3625 |
| Ltk_melanoid allele | .....A.                                                                                                                         | 3625 |
| Ltk_wildtype allele | .....G.                                                                                                                         | 3625 |
| Consensus           | TGCGGCCCCAGGCTCCAGTGGCATGACTCCTCTGGTGATGAGCCCCAGCCTCRCACAGCAGCTAGTACAGCGATCACCAGAGGCACAACGACTAGGGCCTAAAAATTGTCGAGTGCCCGCAAGAG   | 3750 |
| Ltk_melanoid allele | .....A.                                                                                                                         | 3750 |
| Ltk_wildtype allele | .....G.                                                                                                                         | 3750 |
| Consensus           | CTCATTGTGGACAGCCTGGGAGGATGGGCTGTGCAGGAGCCATCGCTGCCGTGCCCTCAGTGACTCCACCAGTGCGCCCTGGTTCCAGCAAAACTCYAGCTCAATTGCTGAGKGACACAMTGCAGAC | 3875 |
| Ltk_melanoid allele | .....C.....T.....C.....                                                                                                         | 3875 |
| Ltk_wildtype allele | .....T.....G.....A.....                                                                                                         | 3875 |
| Consensus           | AGCACAAAGACTGACCAACAAAAACAAGAACCTCTGGAACCCACCTATGGTCCCTTAGTCATGGATAGTGCCTGCCGATCTAGTCAAAATACTAACCCCTAAACCGACKGTTGAACAAGAAGATT   | 4000 |
| Ltk_melanoid allele | .....G.....                                                                                                                     | 4000 |
| Ltk_wildtype allele | .....T.....                                                                                                                     | 4000 |
| Consensus           | CTGGTTTCGATGGGAACTGTAGTCCCTCCCCAGTTCGCGAGCATCTCCAAACAGAGGACAGTGCCTCACCCTAGACATTGGCGGGATTGAGCTGGTCAAGCTCCAGAACTTTCCATGCGGCAAT    | 4125 |
| Ltk_melanoid allele | .....                                                                                                                           | 4125 |
| Ltk_wildtype allele | .....                                                                                                                           | 4125 |
| Consensus           | GTGAATTATGCATACGATGACCTCTGTTTTGAAATGGATGGGGCCTCTGCAGTGGACACAAGAGACAGAACAGCTGTCTTAAGAAGTGCCAGCCTCTCGGCGAGGGCCTTGTCTCCGAAAAGCA    | 4250 |
| Ltk_melanoid allele | .....                                                                                                                           | 4250 |
| Ltk_wildtype allele | .....                                                                                                                           | 4250 |
| Consensus           | AGACAAACACCTGGGGAGAGGGACTCCGGCCTGTCCCTTTCTGAAGACTTAAGTCTCACACCAAGTATAG                                                          | 4320 |
| Ltk_melanoid allele | .....                                                                                                                           | 4320 |
| Ltk_wildtype allele | .....                                                                                                                           | 4320 |

**Supplemental File S8.** *Ltk* amino acid sequences for *A. mexicanum* wildtype and *melanoid* alleles, and orthologous sequences from *Danio rerio*, *Gallus gallus*, *Geotrypetes seraphini*, and *Xenopus tropicalis*. Dots show conserved amino acids relative to the consensus. Pink amino acids mark nonsynonymous polymorphisms between the *A. mexicanum melanoid* allele and *A. mexicanum* wildtype allele that are polymorphic in other vertebrate orthologs. Red amino acids mark nonsynonymous polymorphisms that are unique to the *A. mexicanum melanoid* allele.

|                       |                                                                                                                          |      |
|-----------------------|--------------------------------------------------------------------------------------------------------------------------|------|
| Consensus             | MGFPXXJXXXXXXXXXCLVAVSXGSGAIEDIXSPRPSPGAXQXXDXLEDHLSSEKXSCBLESDCPWTSSRTXNGXPXWKRISXGALTSQ-REXILLXDSSSPGDMXGGILL--NT      | 117  |
| A. mexicanum melanoid | -----GF.N.....T.....S.QA.T.....A.Y.N.....D.AE.H.E..PP...G.-H.D...G.A...K.L...--                                          | 101  |
| A. mexicanum wildtype | -----GF.N.....T.....S.QA.T.....A.Y.N.....D.AE.H.E..PP...G.-H.D...G.A...K.L...--                                          | 101  |
| D. rerio              | ---MDYITRQTFVKLALFIFTVLR.S.C.LLEKAAED.VH.NPL.SSPAEDS.V-----SF.DF..P.S..L.SHSF.G-D.FIT.AQQHR.SR.DTQPIR.Y.T--KSE.HF..KPSS  | 109  |
| G. gallus             | -----MG.V..CS..HEVNSSAPIP.EKFSLIRNM.SFLQP-EP.I...IIG.S.S.MT.TDSF.K.D.VLS.VSV.V..E.QQ...EN...Q.GVE.D.F.--                 | 100  |
| G. seraphini          | -----MSLTK.M.C.PHLSSALQ.ILWTITMLTVIICSGLDEKK..TVK.S.MS.NETVSY.KP.---NA.....F                                             | 70   |
| X. tropicalis         | ...FSQLVSHLLVWTH.L.DLCS.LH.ESIMSLNL-----ITSES.SDDEKVEQGGQ..DFKIH...V..TKRD.K.H.VHTVV.E.A.EKQRE-..ESQ.T.RHKQDE..F.--      | 112  |
| Consensus             | SKLXAGRCFEXLSSPXLFWSSAXCLLELXVSPXG-PMPGRXTVQVVMHMSNXTXIXLKTGGXMKRXTWKLLTAXIGQVNEPFFQISXXYSSCGVEXXXGLLAFBSLRLXCNCFDEEGP   | 236  |
| A. mexicanum melanoid | ..-H..Q...R...L.....Q...MD...P-A...L.....T.KVAV...GA...E.R...D...DA...VA...KEE...N...SS.R...--                           | 219  |
| A. mexicanum wildtype | ..-H..Q...R...L.....Q...MD...P-A...L.....T.KVAV...GA...E.R...D...DA...VA...KEE...N...SS.R...--                           | 219  |
| D. rerio              | ..H.S...S.BMT.VVLS.GPF.H.Q.ARFQ.E--HA.NISAF.K.TD.TDIKP.D.TIKEQ.SDSSQ.EV.E.V..L...VTVQ..A.SSHEV-F..D..E.K..VMGGDDYV       | 226  |
| G. gallus             | ..R-PD..K.S.H..I..G.VDS...A...QDAV.LLQ.F..EIRYVDT.RNII.S.V.HE.DAGVK..SMM.Q..RIER..K.TLL..N..AQEA-...VG..Q..R...H.K.N.    | 218  |
| G. seraphini          | ..HF-SE...HFQ.HV..R..S...FF..WHE-..I.E.F...IQ.L.T.LS.Y.P.RQE.E.WIKG--PV.VQ...R.LL...L.NST..M.LD...K..H.V.L               | 186  |
| X. tropicalis         | ..QSTENCATVW.L..I.TAG.EM.Q...VL..QED---AIM.AM.HNI.A..SLPLS..EK-TVN..SN..M.S.E.AG...LD.TH-..QTADHPVLE..T.RH.SAGYQDS       | 226  |
| Consensus             | DL-SRCTXXSFXCTSGGCGISLQVCDFXHDCPXGDEGDCASXLPEGYCS.FESGACGWTXBDTAAT-SWSIVDSKQXXEAPXGLGSALKATXGHFLYLRVQSQWADGXARAYSANLP    | 354  |
| A. mexicanum melanoid | ..-...QD...Y...A...R...L...G.....L...AF..S...D.AMD.A.A...TDP...V...T.....D...T.....                                      | 338  |
| A. mexicanum wildtype | ..-...QD...Y...A...R...L...G.....L...AF..S...D.AMD.A.A...TDP...V...T.....D...T.....                                      | 338  |
| D. rerio              | ..G.D.EKY..LP.H...E.KR...T..E...L..ST-..L.S...L.S...LAA..QS--..RL.SGQ.LIEDTHL..TT..N.Q...F.K.RGHGDTER.LVQ.PA...          | 343  |
| G. gallus             | ..-IYNKG...P.LH...V.H..I.E.IS..TK.V..VR.D-..SH..K.S...LNE...S-P..KGFNDMIHSGSFV..QS.G...AD.NHTN.M.K.F.TS...               | 335  |
| G. seraphini          | HI-P.KNGFD.P.MY...TH...N.YT..SE...T.MQR..A...A...LN...V-T..FK.ENIAHKI.F..S.Q.KN...QE..E.S...R...                         | 304  |
| X. tropicalis         | FM-PT.VGEN..F.DN.D..NTVNL...TN...T...AL.EII..S.S...DD.T...PY.GND..T.LYT.AT.IEDTS---D..LVK...S...KRS..S.TI...VF.          | 341  |
| Consensus             | XVXSNQDCQCVQSFVHIFGAYNGTVSLXVLEXXAG-TGSAQLWERTSGWGXWFFVTLXLPQLXQXQXQXSLADIAVDNITFXADCFHXGRXXQ-XGKHGFAREVNRXKEP           | 472  |
| A. mexicanum melanoid | G.F.S...K...A...A...K.V..P.....A...R...N.Q...RDG...V...G.....VT...E..HG..A...R...R.E.                                    | 457  |
| A. mexicanum wildtype | G.F.S...K...A...A...K.V..P.....A...R...N.Q...RDG...V...G.....VT...E..HG..A...R...R.E.                                    | 457  |
| D. rerio              | STI...L...LYRY.DF...L.S.V.SG.S--APA.I...S.H.K.A.QEI..PIT.IL.G.H.KV..F.TSG.K...L.D.SLS.A..DTELNELL---E---GLPHDL           | 451  |
| G. gallus             | ASIAATE.Y.I...V.S...I.FS.R.ERN--VPVTLPM..A..S.H..LI..PM.V...R..Q.L.T..N.Q...I...GM..AD..QPTHFK...P..ISSPDEH              | 454  |
| G. seraphini          | AMVA.NT.K..A..N.TL.S...FLV.ES.V--KFW...KV..S.H..I..RP...R.H.K.L..S.N...V...GL..NDE..QID-SERQ.VSQKI.AL.D-                 | 421  |
| X. tropicalis         | K.VT.NV..LS.KFL.S.I...SLGIYG..DGK..M..SVKL.VKQ.AS.NF.NSG..QI.QP..R.R.LVV.T...N...H..L..V..SV...A..IEIG---YENHGL.DDF.DD   | 456  |
| Consensus             | QLTPLEPSPASGETSXVWFVFXCGASGPHGPTQAQCDNAYRNTNVSVTVXKEGPLXGVQXWXPATNXRYISAYGAAGKGAKNHNKRSHGVFISAXFXLQKDEJLYLVYLVQGGEDACP   | 592  |
| A. mexicanum melanoid | ...D...A...D...A...D...A...R...MATD.A.Q...I.R...I.....L.....D.R...L.....                                                 | 577  |
| A. mexicanum wildtype | ...D...A...D...A...D...A...R...MATD.A.Q...I.R...I.....L.....D.R...L.....                                                 | 577  |
| D. rerio              | DFS...-A.PIT...S...F...S...V.G...R..M.K...T.K...T.P.E.GDI..I.H...                                                        | 570  |
| G. gallus             | L.N..E..LP.D..V.L..L..ST...GS...I.E..R.R..V..R...R...E...T.Q.E..L.....                                                   | 574  |
| G. seraphini          | M.F.P.QS.TL..P.EM..L.SP...R...V...M.G...-...Q..M.K...DT.K...P...A.I.Q...I.S...G...                                       | 538  |
| X. tropicalis         | TVM..S...YTD.N.EL.LQ..S...T...SS.I..V.G...R...L.K.F.SV.Q...NPA...I.P...I.....                                            | 576  |
| Consensus             | GGNVLTXEICLGESSXIEYEXKXKTLTLLZWAGGGGGGGGAXIFXXKXNVFRPLLIAAGGGGKAYLEDPPXSLDQAHLEQFENSTAVPGVNGRSGAAGGGGGWDXTLPRAGKSLEGA    | 712  |
| A. mexicanum melanoid | ...R.L...D...IT.L.Y.N...Q...L...S...I..LD...K.G.S...E..K.I.A...S...M...                                                  | 697  |
| A. mexicanum wildtype | ...R.L...D...IT.L.Y.N...Q...L...S...I..LD...K.G.S...E..K.I.A...S...M...                                                  | 697  |
| D. rerio              | ..R.PQ.HK...V..DGFQDGS.A.K...T..IYME..QPL...F...ESQ..SFR..Y..D.T.S.S...S.VSS.SW..V.G                                     | 690  |
| G. gallus             | ..A.PQ.HK...V..ED.KK.D.KD...T.V.RQKD.I.E...KADQN..DVP..Y...S..T...Q.V...Q...G                                            | 694  |
| G. seraphini          | ..MKQ...V..E..K.KRA..E...T.V.V...K..I...S.M.H.DS..HMY...N...I.Q...K.I.HF.S...                                            | 658  |
| X. tropicalis         | ..K.E..K...M.K..I..DN.D.QNRFSE...S.V..EV..E.I..V...QEDP..FI.P.R..N...P..M...I.E..V...F...                                | 696  |
| Consensus             | EGGQXCPQAXAKLQWXTSGFGGGGGGACTSGGGGGGYRGVASEXDDITXDGGQDISFVXPXGXIFLQPLAAMESHGEVQIZVFLNCSHCXVXNCKRDPDTKLVCJCKXSGEVLASDNVT  | 832  |
| A. mexicanum melanoid | ...KV...S.N.H.T...K...F..L.T.E...MS.A.E...E...N...G...R...T.I.K.L...IN                                                   | 817  |
| A. mexicanum wildtype | ...KV...S.N.H.T...K...F..L.T.E...MS.A.E...E...N...G...R...T.I.K.L...IN                                                   | 817  |
| D. rerio              | Q..SS..E.LSV.G.A.F...SA...D..PLL..SA...L...H.M.K...AE.V.Y...KTQS...E...IL.L.D.D...P...                                   | 810  |
| G. gallus             | ...A.H..L...A...D...H..KN...AG..Y...N.I.E..H..V..ND...EVQIY...H.D...N.N.P..Q.EM.A..N...                                  | 814  |
| G. seraphini          | ...S.N.SFS...V.F...P..A...R...TAN...V..N.I.K..V...D...QL...S.RK...Q.L.A.V.LQ.T...G...                                    | 778  |
| X. tropicalis         | ...T.YK.IT...H...P...Q...L...FT..Y.V..FH.SVK..H...KL.V...YTD...INRS..L.EV.T...T...                                       | 816  |
| Consensus             | CTX-----PXEXHXPLPLILAVVXATVILGVIXTCGSLXKVYHRKKQQLGARIRLOSSEYKLSKIRTSTIMTDYNPNYCFAGKAATLSELKEI                            | 922  |
| A. mexicanum melanoid | ..E-----DL.E.F.I..S..T.....F..G..V.....                                                                                  | 907  |
| A. mexicanum wildtype | ..E-----DL.E.F.I..S..T.....F..G..V.....                                                                                  | 907  |
| D. rerio              | ..AGTKHSLQCFINKHLQHNSSPLVCPPLVPMGSLADGPPS.VF.M..IVS..VT..VL.A..TLI.Y..NH.HAV...P...S...GYF...S...V                       | 930  |
| G. gallus             | ..-----V-----P-----QGHIP.G.L..L...AVI.M.L.M.L.G..II..L...A...P...A...R...L...                                            | 907  |
| G. seraphini          | ..RG-----T-----RPRH...I.A.V..IVL.S..AI..R..P..V..QA...F...V...S...L                                                      | 866  |
| X. tropicalis         | ..VV-----P-----K-----W.LA.KQL..S...LI...I.FA...F...K...V...T...S.I...G...S...V                                           | 909  |
| Consensus             | PRKNISLLRALGHGAFGEVYEGTVVVGXAGDPNPLQVAIKTLPEIXSEQDEMFLEALIIISKFSQNIIVRCIGVSLQTLPRFILLELMAGGDMKSLRQNRPRVNPQSSITMLDLINMAR  | 1042 |
| A. mexicanum melanoid | ...M...S...M...S...V...LK...                                                                                             | 1027 |
| A. mexicanum wildtype | ...M...S...M...S...V...LK...                                                                                             | 1027 |
| D. rerio              | ...T...Q.L.MN.ENTAM...S...M...I...T...L...T.HS..S.E.H...                                                                 | 1050 |
| G. gallus             | ...I...IT.L...I...VC...N...Q...V...Q...I...                                                                              | 1027 |
| G. seraphini          | ..R...I...T.I.E.LT.R...SC...Q...M...EK..T.I.Q...                                                                         | 986  |
| X. tropicalis         | ...T...M...IS...C...S...WI...T.S...                                                                                      | 1029 |
| Consensus             | DIACGCKYLEENHFIRHDAARNCLLTCXGQGRVAKIGDFGMARDIYRASYYRKGGRAMLPVKWMPPEAFLEGIFTSKTDITWSFGVLLWEIFSLGYMPYCKTNQEVLEFVTSGGRMDFP  | 1162 |
| A. mexicanum melanoid | ...S...D...G...P...D...C...G...                                                                                          | 1147 |
| A. mexicanum wildtype | ...S...D...G...P...D...C...G...                                                                                          | 1147 |
| D. rerio              | ...L..R...P.PD...C...G...                                                                                                | 1170 |
| G. gallus             | ...T.A.I...V...G...                                                                                                      | 1147 |
| G. seraphini          | ...S.KD...V...                                                                                                           | 1106 |
| X. tropicalis         | ...YS.T...V...                                                                                                           | 1149 |
| Consensus             | KNCPPGVYRIMTQCWQHSPEYRPBFXITLIERIKYCTQDPDVINTELPVECKPAPEXEGSTXMRPAGSSGMTPLLXSPSLXXQLXRX---SXEAQRXGPKL-VXCPQELLVESLGGWVXV | 1277 |
| A. mexicanum melanoid | ...S...D...T...V...S...E..AG...VM...Q..VQ...P...L..I..E...I.D...A..Q                                                     | 1262 |
| A. mexicanum wildtype | ...S...D...T...V...S...E..AG...VM...Q..VQ...P...L..I..E...I.D...A..Q                                                     | 1262 |
| D. rerio              | ..S...C..H..N.T...N...P...G.PV.E..G.VI..D..GS...VAR..SQDASP.ASIT.VTP.ALK.R.QLQR.VH.TQ.VGTYRETL                           | 1290 |
| G. gallus             | ...N.S...N.S...Q..M.S.T..D.N.VV..SVP..IV..V..TP.MTPK---LDTHCT.H...Q...N.SNRATR                                           | 1262 |
| G. seraphini          | ..K...S.N.SFS...C.D.S...I..G.S.D..ESI.Q.TA.E-IV..AT.I..PK.TSG---KL.EHTVH--GDH...D.NMK                                    | 1220 |
| X. tropicalis         | ...T.H.N.S...S...P...SG...D...SI..NSCN.LN.IMS.QPIAFL-----DT.STEQ...-GDV...N.A.NIK                                        | 1259 |
| Consensus             | EPSLP---CLSDSTSAXWFQ-QNSSIAEIXLQT-XXRLKNXKKNLWNPTGYSVWME-----S-X-CRSSXNKNPKXTVEQEDS--GFDGNCSSSPSSR-----A                 | 1363 |
| A. mexicanum melanoid | ...CT...AQ..T.N...L.D-----A...Q.T.P...                                                                                   | 1348 |
| A. mexicanum wildtype | ...CT...AQ..T.N...L.D-----A...Q.T.P...                                                                                   | 1348 |
| D. rerio              | ..CWAEPVPA.GVCPGP.L.VPEHRPCSR.SSSSGSQK..T...L.SFGRGKSALCHTQ.MPLS.NPTSVSA.SS.S.HT.PVVEVNA.V.A..PPSAAPSQTTLTPT.            | 1410 |
| G. gallus             | G...FN..S.I...NQRL.FSNPP-TH...T...L-----N-----HL.PISKL.V.P.R...ASP-----                                                  | 1350 |

---

|                       |                                                                                                                 |      |
|-----------------------|-----------------------------------------------------------------------------------------------------------------|------|
| G. seraphini          | S...S--..T..N.KS.IH-.....EQ.K..I-MH....PQ.....-G-----IGS.CSF.VVLD.....C.....                                    | 1303 |
| X. tropicalis         | T.G.Q--TVAE..EGS...-S.L.TTT.K...-THK....S.....STC-----                                                          | 1374 |
| Consensus             | SPXRGG--CAHLDIGGI-ELVKLQNFPCGNVNYAYDDLCFEXDG-----XSKVDTDRDXAVLRSXSLCGXGLVLR-----KXEKFXGERDSGLSLSEDLSXTPV        | 1454 |
| A. mexicanum melanoid | ..N...--.....M.....-A.A.....T....A...E.....-QD..P.....L...                                                      | 1439 |
| A. mexicanum wildtype | ..N...--.....M.....-A.A.....T....A...E.....-QD..P.....L...                                                      | 1439 |
| D. rerio              | A.S.KSPTGA.GVSLATVMD.A...S.....EQSY.TESLPVVVSKSLEPST.SAA.SSLV.LSQPG.FTHKP..K.HASYGHEDVRRYTQP...TRD...F.....V... | 1530 |
| G. gallus             | ..S.NN--..P.....GT.H-S-----PS.L.GV.A...S..HTDEKPFY-----T...AAR.....D...V...                                     | 1441 |
| G. seraphini          | ..DQDH--GP...N.L..VD...T..S.....NY.I.N-T-----K..A...NGRFQVDAQI...P...IA.....D.FNI...                            | 1389 |
| X. tropicalis         | -----                                                                                                           | 1314 |
